# Supplementary material
Source: PubMed Central journal article supplement (PMC1697796)
Supplement: NIHMS14148-supplement-Appendices.pdf [file NIHMS14148-supplement-Appendices.pdf]

## Appendix 1 – Height thresholds for automated microsatellite analysis

| Marker | %OfHighest | %OfMinus3 | %OfPlus3 | %Of(Minus3 + Plus3) | %OfPlus6 |
|--------|------------|-----------|----------|---------------------|----------|
| TA40   | 2.5        | 5         | 7        | 10                  | -        |
| TA60   | 2.5        | -         | 11       | 8                   | -        |
| TA81   | 2.5        | 3         | 15       | 9                   | 3        |
| PfPK2  | 2.5        | -         | 16       | 4                   | 4        |

\* Each threshold defines the relative height a given peak must attain compared to other peaks in the sample. If a peak is below any threshold, it is filtered out. %OfHighest = height as a percentage of the height of the highest peak in the sample; %OfMinus3 = height as a percentage of the height of a peak located 3 bases shorter, if present; %OfPlus3 = height as a percentage of the height of a peak located 3 bases longer, if present; %Of(Minus3+Plus3) = height as a percentage of the total of the heights of peaks located 3 bases shorter and 3 bases longer, if both are present; %OfPlus6 = height as a percentage of the height of a peak located 6 bases longer, if present.

## Appendix 2 - Detailed results for detection of laboratory clones

| #  | Laboratory clones present in sample (parasites/ $\mu$ l)* |        |        |        |        |        |        | Clones missed by genotyping at each locus† |             |      |      |      |       |  |
|----|-----------------------------------------------------------|--------|--------|--------|--------|--------|--------|--------------------------------------------|-------------|------|------|------|-------|--|
|    | 3D7                                                       | FCR3   | HB3    | K1     | W2     | V1/S   | Total  | <i>msp1</i>                                | <i>msp2</i> | TA40 | TA60 | TA81 | PfPK2 |  |
| 1  | Negative Control                                          |        |        |        |        |        |        | 0                                          |             |      |      |      |       |  |
| 2  | 50                                                        |        |        |        |        |        | 50     |                                            |             |      |      |      |       |  |
| 3  |                                                           | 50     |        |        |        |        | 50     |                                            |             |      |      |      |       |  |
| 4  |                                                           |        | 50     |        |        |        | 50     |                                            |             |      |      |      |       |  |
| 5  |                                                           |        |        | 50     |        |        | 50     |                                            |             |      |      |      |       |  |
| 6  |                                                           |        |        |        | 50     |        | 50     |                                            |             |      |      |      |       |  |
| 7  |                                                           |        |        |        |        | 50     | 50     |                                            |             |      |      |      |       |  |
| 8  | 500                                                       |        |        |        |        |        | 500    |                                            |             |      |      |      |       |  |
| 9  |                                                           | 500    |        |        |        |        | 500    |                                            |             |      |      |      |       |  |
| 10 |                                                           |        | 500    |        |        |        | 500    |                                            |             |      |      |      |       |  |
| 11 |                                                           |        |        | 500    |        |        | 500    |                                            |             |      |      |      |       |  |
| 12 |                                                           |        |        |        | 500    |        | 500    |                                            |             |      |      |      |       |  |
| 13 |                                                           |        |        |        |        | 500    | 500    |                                            |             |      |      |      |       |  |
| 14 | 5,000                                                     |        |        |        |        |        | 5,000  |                                            |             |      |      |      |       |  |
| 15 |                                                           | 5,000  |        |        |        |        | 5,000  |                                            |             |      |      |      |       |  |
| 16 |                                                           |        | 5,000  |        |        |        | 5,000  |                                            |             |      |      |      |       |  |
| 17 |                                                           |        |        | 5,000  |        |        | 5,000  |                                            |             |      |      |      |       |  |
| 18 |                                                           |        |        |        | 5,000  |        | 5,000  |                                            |             |      |      |      |       |  |
| 19 |                                                           |        |        |        |        | 5,000  | 5,000  |                                            |             |      |      |      |       |  |
| 20 | 50,000                                                    |        |        |        |        |        | 50,000 |                                            |             |      |      |      |       |  |
| 21 |                                                           |        | 50,000 |        |        |        | 50,000 |                                            |             |      |      |      |       |  |
| 22 |                                                           |        |        |        | 50,000 |        | 50,000 |                                            |             |      |      |      |       |  |
| 23 |                                                           |        | 2,000  |        | 1,000  | 7,000  | 10,000 |                                            |             |      |      |      |       |  |
| 24 |                                                           |        | 1,000  |        | 2,000  | 7,000  | 10,000 |                                            |             |      |      |      |       |  |
| 25 |                                                           |        | 7,000  |        | 1,000  | 2,000  | 10,000 | W2                                         |             |      |      |      |       |  |
| 26 |                                                           |        | 7,000  |        | 2,000  | 1,000  | 10,000 | W2                                         |             |      |      |      |       |  |
| 27 |                                                           |        | 1,000  |        | 7,000  | 2,000  | 10,000 |                                            |             |      |      |      |       |  |
| 28 |                                                           |        | 2,000  |        | 7,000  | 1,000  | 10,000 |                                            |             |      |      |      | HB3   |  |
| 29 |                                                           |        | 10,000 |        | 5,000  | 35,000 | 50,000 |                                            |             |      |      |      |       |  |
| 30 |                                                           |        | 5,000  |        | 10,000 | 35,000 | 50,000 |                                            |             |      |      | HB3  | HB3   |  |
| 31 |                                                           |        | 35,000 |        | 5,000  | 10,000 | 50,000 | W2                                         |             |      |      |      |       |  |
| 32 |                                                           |        | 35,000 |        | 10,000 | 5,000  | 50,000 | W2                                         |             |      |      |      |       |  |
| 33 |                                                           |        | 5,000  |        | 35,000 | 10,000 | 50,000 |                                            |             |      |      |      | HB3   |  |
| 34 |                                                           |        | 10,000 |        | 35,000 | 5,000  | 50,000 |                                            |             |      |      |      | HB3   |  |
| 35 | 50                                                        | 50     | 50     | 50     | 50     | 50     | 300    | 3D7                                        | FCR3        |      |      |      |       |  |
| 36 | 500                                                       | 500    | 500    | 500    | 500    | 500    | 3,000  |                                            | FCR3        |      |      |      |       |  |
| 37 | 5,000                                                     | 5,000  | 5,000  | 5,000  | 5,000  | 5,000  | 30,000 |                                            | FCR3        |      |      |      |       |  |
| 38 | 10,000                                                    | 2,500  | 10,000 | 2,500  | 2,500  | 2,500  | 30,000 | FCR3                                       | FCR3,K1     |      |      |      |       |  |
| 39 | 15,000                                                    | 2,500  | 5,000  | 2,500  | 10,000 | 15,000 | 50,000 |                                            | FCR3,K1     |      |      |      |       |  |
| 40 | 2,500                                                     | 2,500  | 30,000 | 10,000 | 2,500  | 2,500  | 50,000 | FCR3                                       | FCR3,W2     | 3D7  |      |      |       |  |
| 41 | 5,000                                                     | 5,000  | 25,000 | 5,000  | 5,000  | 5,000  | 50,000 | FCR3                                       | K1          |      |      |      |       |  |
| 42 | 5,000                                                     | 25,000 | 10,000 | 2,500  | 5,000  | 2,500  | 50,000 |                                            | K1          |      |      | K1   | HB3   |  |
| 43 | 2,500                                                     | 2,500  | 2,500  | 10,000 | 2,500  | 30,000 | 50,000 | 3D7                                        | FCR3        | 3D7  |      | HB3  | HB3   |  |
| 44 | 2,500                                                     | 2,500  | 2,500  | 30,000 | 2,500  | 10,000 | 50,000 | 3D7                                        |             | 3D7  | 3D7  | 3D7  | HB3   |  |

\* For each sample #1--44, the composition of laboratory clones is denoted by listing the parasite density for each clone present in the appropriate column, with total parasite density indicated in the last column

† If alleles of laboratory clones present in a sample were not detected by a particular locus, the names of the corresponding missed clones are indicated

### Appendix 3 - Detailed results for detection of false positive alleles

| #  | Laboratory clones present in sample (parasites/ $\mu$ l) <sup>*</sup> |        |        |        |        |        |        | Number of false positive alleles <sup>†</sup> |             |      |      |      |       |  |
|----|-----------------------------------------------------------------------|--------|--------|--------|--------|--------|--------|-----------------------------------------------|-------------|------|------|------|-------|--|
|    | 3D7                                                                   | FCR3   | HB3    | K1     | W2     | V1/S   | Total  | <i>msp1</i>                                   | <i>msp2</i> | TA40 | TA60 | TA81 | PfPK2 |  |
| 1  | Negative Control                                                      |        |        |        |        |        |        | 0                                             |             |      |      |      |       |  |
| 2  | 50                                                                    |        |        |        |        |        | 50     |                                               |             |      |      |      |       |  |
| 3  |                                                                       | 50     |        |        |        |        | 50     |                                               |             |      |      |      |       |  |
| 4  |                                                                       |        | 50     |        |        |        | 50     |                                               |             |      |      |      |       |  |
| 5  |                                                                       |        |        | 50     |        |        | 50     |                                               |             | 1    |      |      |       |  |
| 6  |                                                                       |        |        |        | 50     |        | 50     |                                               | 1           |      |      |      |       |  |
| 7  |                                                                       |        |        |        |        | 50     | 50     |                                               |             |      | 1    |      |       |  |
| 8  | 500                                                                   |        |        |        |        |        | 500    |                                               |             |      |      |      |       |  |
| 9  |                                                                       | 500    |        |        |        |        | 500    |                                               |             |      |      |      |       |  |
| 10 |                                                                       |        | 500    |        |        |        | 500    |                                               |             |      |      |      |       |  |
| 11 |                                                                       |        |        | 500    |        |        | 500    |                                               | 2           |      |      |      |       |  |
| 12 |                                                                       |        |        |        | 500    |        | 500    |                                               | 1           |      |      |      |       |  |
| 13 |                                                                       |        |        |        |        | 500    | 500    |                                               |             |      |      |      |       |  |
| 14 | 5,000                                                                 |        |        |        |        |        | 5,000  |                                               |             |      |      |      |       |  |
| 15 |                                                                       | 5,000  |        |        |        |        | 5,000  |                                               |             |      |      |      |       |  |
| 16 |                                                                       |        | 5,000  |        |        |        | 5,000  |                                               |             |      |      |      |       |  |
| 17 |                                                                       |        |        | 5,000  |        |        | 5,000  |                                               | 2           |      |      |      |       |  |
| 18 |                                                                       |        |        |        | 5,000  |        | 5,000  |                                               | 2           |      |      |      |       |  |
| 19 |                                                                       |        |        |        |        | 5,000  | 5,000  |                                               |             |      |      |      |       |  |
| 20 | 50,000                                                                |        |        |        |        |        | 50,000 |                                               |             |      |      |      |       |  |
| 21 |                                                                       |        | 50,000 |        |        |        | 50,000 |                                               |             |      |      |      |       |  |
| 22 |                                                                       |        |        |        | 50,000 |        | 50,000 |                                               | 2           |      |      |      |       |  |
| 23 |                                                                       |        | 2,000  |        | 1,000  | 7,000  | 10,000 |                                               | 2           |      |      |      |       |  |
| 24 |                                                                       |        | 1,000  |        | 2,000  | 7,000  | 10,000 | 1                                             | 3           |      |      |      |       |  |
| 25 |                                                                       |        | 7,000  |        | 1,000  | 2,000  | 10,000 |                                               | 2           | 1    |      |      | 2     |  |
| 26 |                                                                       |        | 7,000  |        | 2,000  | 1,000  | 10,000 |                                               | 1           |      |      |      | 3     |  |
| 27 |                                                                       |        | 1,000  |        | 7,000  | 2,000  | 10,000 | 1                                             | 3           |      |      |      |       |  |
| 28 |                                                                       |        | 2,000  |        | 7,000  | 1,000  | 10,000 | 1                                             | 2           |      |      |      |       |  |
| 29 |                                                                       |        | 10,000 |        | 5,000  | 35,000 | 50,000 |                                               | 3           |      |      |      |       |  |
| 30 |                                                                       |        | 5,000  |        | 10,000 | 35,000 | 50,000 | 1                                             | 3           |      |      |      |       |  |
| 31 |                                                                       |        | 35,000 |        | 5,000  | 10,000 | 50,000 |                                               | 3           |      |      |      | 3     |  |
| 32 |                                                                       |        | 35,000 |        | 10,000 | 5,000  | 50,000 |                                               | 3           | 1    |      |      | 3     |  |
| 33 |                                                                       |        | 5,000  |        | 35,000 | 10,000 | 50,000 | 1                                             | 3           |      |      |      |       |  |
| 34 |                                                                       |        | 10,000 |        | 35,000 | 5,000  | 50,000 | 1                                             | 3           | 1    |      |      |       |  |
| 35 | 50                                                                    | 50     | 50     | 50     | 50     | 50     | 300    |                                               | 3           |      |      |      | 1     |  |
| 36 | 500                                                                   | 500    | 500    | 500    | 500    | 500    | 3,000  | 1                                             | 3           |      |      |      |       |  |
| 37 | 5,000                                                                 | 5,000  | 5,000  | 5,000  | 5,000  | 5,000  | 30,000 | 1                                             | 3           |      |      |      |       |  |
| 38 | 10,000                                                                | 2,500  | 10,000 | 2,500  | 2,500  | 2,500  | 30,000 |                                               | 2           | 2    |      |      | 3     |  |
| 39 | 15,000                                                                | 2,500  | 5,000  | 2,500  | 10,000 | 15,000 | 50,000 | 1                                             | 2           |      |      |      |       |  |
| 40 | 2,500                                                                 | 2,500  | 30,000 | 10,000 | 2,500  | 2,500  | 50,000 |                                               | 1           | 1    |      |      | 4     |  |
| 41 | 5,000                                                                 | 5,000  | 25,000 | 5,000  | 5,000  | 5,000  | 50,000 |                                               | 2           | 1    |      |      | 4     |  |
| 42 | 5,000                                                                 | 25,000 | 10,000 | 2,500  | 5,000  | 2,500  | 50,000 |                                               | 2           |      |      |      |       |  |
| 43 | 2,500                                                                 | 2,500  | 2,500  | 10,000 | 2,500  | 30,000 | 50,000 |                                               | 2           |      |      |      |       |  |
| 44 | 2,500                                                                 | 2,500  | 2,500  | 30,000 | 2,500  | 10,000 | 50,000 |                                               | 2           |      |      |      |       |  |

<sup>\*</sup> For each sample #1--44, the composition of laboratory clones is denoted by listing the parasite density for each clone present in the appropriate column, with total parasite density indicated in the last column

<sup>†</sup> If alleles were detected not corresponding to laboratory clones present in a sample, the number of false positive alleles are indicated
